# Supplementary material for: Swept Along: Measuring Otoacoustic Emissions Using Continuously Varying Stimuli
Source: Springer Nature journal article supplement (doi:10.1007/s10162-024-00934-5), 2024-02-26
Supplement: MOESM1 [file 26782446]

## **SUPPLEMENTARY INFORMATION**

*Journal of the Association for Research in Otolaryngology*

### **Swept Along: Measuring Otoacoustic Emissions Using Continuously Varying Stimuli**

Christopher A. Shera

Auditory Research Center

Caruso Department of Otolaryngology and Department of Physics & Astronomy  
University of Southern California, Los Angeles, California, USA  
[apg.mechanicsofhearing.org](http://apg.mechanicsofhearing.org); [christopher.shera@usc.edu](mailto:christopher.shera@usc.edu)

## Caption for the Lorenz Attractor Video (Online Resource 2)

The supplemental video and its soundtrack<sup>1</sup> were created by solving the coupled system of Lorenz equations [1],

$$\frac{d}{dt} \begin{bmatrix} x \\ y \\ z \end{bmatrix} = \begin{bmatrix} \sigma(y - x) \\ x(\rho - z) - y \\ xy - \beta z \end{bmatrix}, \quad (1)$$

using standard parameters ( $\{\sigma, \rho, \beta\} = \{10, 28, 8/3\}$ ) and initial conditions ( $\{x, y, z\}_0 = \{20, 5, -5\}$ ). The equations were solved numerically using the Runge-Kutta method [2] (implemented as `ode23` in MATLAB) on the time interval  $[0, 36]$ s using a sampling rate of 16 kHz. The instantaneous frequency trajectories,  $f_1(t)$  and  $f_2(t)$ , were obtained from the solutions  $x(t)$  and  $z(t)$  using the equations

$$\begin{bmatrix} f_1(t) \\ f_2(t) \end{bmatrix} = f_0 \begin{bmatrix} 2^{x(t)/30} \\ \frac{5}{2} 2^{[z(t)-25]/30} \end{bmatrix}, \quad (2)$$

with  $f_0 = 600$  Hz. Finally, the stimulus waveforms were computed as

$$\begin{bmatrix} s_1(t) \\ s_2(t) \end{bmatrix} = \sin \left( 2\pi \int_0^t \begin{bmatrix} f_1(t') \\ f_2(t') \end{bmatrix} dt' \right). \quad (3)$$

The two waveforms were subsequently summed, tapered at onset and offset, and sped up by a factor of 3 for monaural playback. The video is therefore  $36/3 = 12$ s in duration when played at the sampling rate of  $3 \cdot 16 = 48$  kHz.

## Caption for the Lissajous Audio File (Online Resource 3)

The supplemental audio file was created by first defining the following functions

$$f_{\text{DP}}(t) = f_{\text{DP}_1} \left( \frac{f_{\text{DP}_2}}{f_{\text{DP}_1}} \right)^{\Lambda(2\pi N_{\text{DP}} t/T)}, \quad (4)$$

and

$$r(t) = r_1 \left( \frac{r_2}{r_1} \right)^{\Lambda(2\pi N_r t/T)}. \quad (5)$$

In these equations, the parameters  $f_{\text{DP}_{\{1,2\}}}$  represent the desired minimum and maximum values, respectively, of the DP frequency,  $f_{\text{DP}} = 2f_1 - f_2$ . Similarly, the parameters  $r_{\{1,2\}}$  represent the desired range of primary frequency ratios,  $r = f_2/f_1$ . The parameters  $N_{\text{DP}}$  and  $N_r$  specify the desired number of complete Lissajous “orbits” traversed during the time  $T$ , where  $T$  is the total stimulus duration. The function  $\Lambda(t)$  represents a sawtooth waveform in sine phase with range  $[0, 1]$  and period  $2\pi$ . For example,

$$\Lambda(t) = \frac{1}{2} \left\{ 1 + \frac{2}{\pi} \sin^{-1}[\sin(t - \pi/2)] \right\}. \quad (6)$$

<sup>1</sup>The supplemental video and audio files can also be found on the Auditory Physics Group website:

- [apg.mechanicsofhearing.org/downloads/sounds/Swept-Along-Lorenz.mp4](http://apg.mechanicsofhearing.org/downloads/sounds/Swept-Along-Lorenz.mp4)
- [apg.mechanicsofhearing.org/downloads/sounds/Swept-Along-Lissajous.mp4](http://apg.mechanicsofhearing.org/downloads/sounds/Swept-Along-Lissajous.mp4)

With these definitions, the instantaneous frequencies  $f_1(t)$  and  $f_2(t)$  were obtained using the equations

$$f_2(t) = \frac{f_{\text{DP}}(t)}{2/r(t) - 1}, \quad (7)$$

and

$$f_1(t) = f_2(t)/r(t). \quad (8)$$

The stimulus signals were then computed as

$$\begin{bmatrix} s_1(t) \\ s_2(t) \end{bmatrix} = \sin \left( 2\pi \int_0^t \begin{bmatrix} f_1(t') \\ f_2(t') \end{bmatrix} dt' \right). \quad (9)$$

The two stimulus signals were subsequently sampled at 48 kHz using the parameters  $f_{\text{DP}\{1,2\}} = \{0.5, 2\}$  kHz,  $r_{\{1,2\}} = \{1, 4\}$ ,  $N_{\text{DP}} = 5$ ,  $N_r = 9.5$ , and  $T = 20$  s. With these parameters, the equivalent instantaneous sweep rate is  $\pm 1$  oct/s at the DP frequency. Finally, the resulting waveforms were summed for monoaural playback and tapered at onset and offset.

## References

- [1] Lorenz EM (1963) Deterministic nonperiodic flow. *J Atmos Sci* 20:130–141
- [2] Forsythe GE, Malcolm MA, Moler CB (1977) *Computer Methods for Mathematical Computations*. Prentice Hall: Englewood Cliffs, New Jersey
